# Supplementary material for: A genome-wide association study of total child psychiatric problems scores
Source: PubMed Central journal article supplement (PMC9394806; doi:10.1371/journal.pone.0273116), 2022-08-22
Supplement: pone.0273116.s004.pdf [file pone.0273116.s004.pdf]

Table S3: Genes with genome-wide suggestive ( $p < 3e-4$ ) results

| Gene      | Chr | BP Start  | BP Stop   | $n_{\text{snps}}$ | n     | p     |
|-----------|-----|-----------|-----------|-------------------|-------|-------|
| IFT46     | 11  | 118415243 | 118443685 | 43                | 35725 | 3E-05 |
| MAN1A1    | 6   | 119498374 | 119670926 | 495               | 36917 | 8E-05 |
| ARCN1     | 11  | 118443105 | 118473748 | 49                | 34777 | 9E-05 |
| TMEM25    | 11  | 118401756 | 118417995 | 35                | 36873 | 1E-04 |
| SPATA7    | 14  | 88851268  | 88936694  | 58                | 35794 | 1E-04 |
| C14orf180 | 14  | 105046021 | 105056852 | 24                | 31043 | 1E-04 |
| PTPN21    | 14  | 88932122  | 89021077  | 130               | 36435 | 1E-04 |
| OR2G6     | 1   | 248684916 | 248685964 | 1                 | 25907 | 1E-04 |
| TBCA      | 5   | 76986991  | 77164604  | 454               | 36311 | 1E-04 |
| FBXO46    | 19  | 46213887  | 46234162  | 17                | 33100 | 2E-04 |
| TMEM56    | 1   | 95582894  | 95663163  | 184               | 35599 | 2E-04 |
| ARTN      | 1   | 44398992  | 44402913  | 5                 | 35680 | 2E-04 |
| IPO13     | 1   | 44412611  | 44433694  | 21                | 36631 | 2E-04 |
| MUC5B     | 11  | 1244296   | 1283406   | 102               | 31472 | 2E-04 |
| TRPS1     | 8   | 116420724 | 116821899 | 428               | 36001 | 3E-04 |
| SCGB1C1   | 11  | 193080    | 194573    | 4                 | 19491 | 3E-04 |
| LDHAL6A   | 11  | 18477371  | 18501147  | 52                | 32796 | 3E-04 |

**Chr** Chromosome

**BP** Basepair

**Start** Basepair Position of gene start

**Stop** Basepair Position of gene end

**$n_{\text{snps}}$**  Number of SNPs within the gene

**n** Number of participants

**p** p-value
