# Supplementary material for: A genome-wide association study of total child psychiatric problems scores
Source: PubMed Central journal article supplement (PMC9394806; doi:10.1371/journal.pone.0273116), 2022-08-22
Supplement: pone.0273116.s005.pdf [file pone.0273116.s005.pdf]

Table S4: Tissue expression analysis (neural tissues)

| Brain Region              | $\beta$ | $\beta_{SD}$ | SE    | p    | q    |
|---------------------------|---------|--------------|-------|------|------|
| Caudate basal ganglia     | 0.013   | 0.022        | 0.007 | 0.04 | 0.12 |
| Putamen basal ganglia     | 0.013   | 0.022        | 0.007 | 0.04 | 0.12 |
| Anterior cingulate cortex | 0.012   | 0.021        | 0.007 | 0.04 | 0.12 |
| Amygdala                  | 0.012   | 0.021        | 0.007 | 0.05 | 0.12 |
| Hypothalamus              | 0.012   | 0.021        | 0.008 | 0.05 | 0.12 |
| Nucleus accumbens         | 0.011   | 0.019        | 0.007 | 0.06 | 0.12 |
| Hippocampus               | 0.011   | 0.019        | 0.007 | 0.07 | 0.12 |
| Frontal Cortex BA9        | 0.009   | 0.017        | 0.006 | 0.07 | 0.12 |
| Cortex                    | 0.008   | 0.015        | 0.007 | 0.11 | 0.16 |
| Substantia nigra          | 0.008   | 0.015        | 0.008 | 0.15 | 0.19 |
| Cerebellar Hemisphere     | 0.005   | 0.010        | 0.006 | 0.18 | 0.21 |
| Cerebellum                | 0.004   | 0.008        | 0.006 | 0.25 | 0.27 |
| Spinal cord cervical c-1  | 0.000   | 0.000        | 0.008 | 0.51 | 0.51 |

**$\beta$**  Beta

**$\beta_{SD}$**  Beta Standard Deviation

**SE** Standard Error

**p** P-value

**q** False Discovery Adjusted P-values
