# Supplementary material for: A genome-wide association study of total child psychiatric problems scores
Source: PubMed Central journal article supplement (PMC9394806; doi:10.1371/journal.pone.0273116), 2022-08-22
Supplement: pone.0273116.s006.pdf [file pone.0273116.s006.pdf]

Table S5: Tissue expression analysis (organs)

| Tissue          | $\beta$ | $\beta_{SD}$ | SE   | p    | q    |
|-----------------|---------|--------------|------|------|------|
| Brain           | 0.02    | 0.03         | 0.01 | 0.06 | 0.81 |
| Liver           | 0.01    | 0.01         | 0.01 | 0.08 | 0.81 |
| Breast          | 0.02    | 0.03         | 0.01 | 0.13 | 0.81 |
| Pituitary       | 0.01    | 0.03         | 0.02 | 0.18 | 0.81 |
| Adipose tissue  | 0.00    | 0.01         | 0.01 | 0.23 | 0.81 |
| Nerve           | 0.01    | 0.01         | 0.01 | 0.26 | 0.81 |
| Kidney          | 0.01    | 0.01         | 0.01 | 0.28 | 0.81 |
| Skin            | 0.01    | 0.01         | 0.01 | 0.28 | 0.81 |
| Muscle          | 0.01    | 0.01         | 0.01 | 0.29 | 0.81 |
| Vagina          | 0.01    | 0.01         | 0.01 | 0.30 | 0.81 |
| Bladder         | 0.00    | 0.01         | 0.01 | 0.32 | 0.81 |
| Colon           | 0.01    | 0.01         | 0.01 | 0.32 | 0.81 |
| Stomach         | 0.00    | 0.00         | 0.01 | 0.38 | 0.87 |
| Testis          | 0.00    | 0.00         | 0.02 | 0.48 | 0.87 |
| Blood           | 0.00    | 0.00         | 0.01 | 0.48 | 0.87 |
| Pancreas        | 0.00    | 0.00         | 0.01 | 0.48 | 0.87 |
| Salivary Gland  | 0.00    | 0.00         | 0.01 | 0.50 | 0.87 |
| Cervix Uteri    | 0.00    | 0.00         | 0.01 | 0.59 | 0.94 |
| Small intestine | 0.00    | -0.01        | 0.02 | 0.62 | 0.94 |
| Blood vessel    | 0.00    | 0.00         | 0.01 | 0.63 | 0.94 |
| Prostate        | -0.01   | -0.01        | 0.02 | 0.66 | 0.94 |
| Heart           | -0.01   | -0.01        | 0.01 | 0.71 | 0.94 |
| Uterus          | -0.01   | -0.01        | 0.01 | 0.72 | 0.94 |
| Esophagus       | -0.01   | -0.02        | 0.01 | 0.78 | 0.94 |
| Spleen          | -0.01   | -0.02        | 0.01 | 0.82 | 0.94 |
| Adrenal gland   | -0.01   | -0.02        | 0.01 | 0.86 | 0.94 |
| Fallopian tube  | -0.01   | -0.02        | 0.01 | 0.88 | 0.94 |
| Thyroid         | -0.02   | -0.03        | 0.01 | 0.91 | 0.94 |
| Lung            | -0.02   | -0.03        | 0.01 | 0.91 | 0.94 |
| Ovary           | -0.02   | -0.03        | 0.01 | 0.96 | 0.96 |

 **$\beta$**  Beta **$\beta_{SD}$**  Beta Standard Deviation**SE** Standard Error**p** P-value**q** False Discovery Rate Adjusted P-values
