# Supplementary material for: A genome-wide association study of total child psychiatric problems scores
Source: PubMed Central journal article supplement (PMC9394806; doi:10.1371/journal.pone.0273116), 2022-08-22
Supplement: pone.0273116.s007.pdf [file pone.0273116.s007.pdf]

Table S6: Genetic correlations with thought disorders by assessment age

| Total Problems Age Group | Correlated trait | PMID     | $r_G$ | SE   | p    |
|--------------------------|------------------|----------|-------|------|------|
| <12 years                | Schizophrenia    | 25056061 | 0.06  | 0.04 | 0.07 |
| ≥12 years                | Schizophrenia    | 25056061 | 0.11  | 0.06 | 0.08 |
| <12 years                | Bipolar disorder | 21926972 | -0.09 | 0.07 | 0.17 |
| ≥12 years                | Bipolar disorder | 21926972 | -0.02 | 0.10 | 0.85 |

**PMID** PubMed ID,  $r_G$  Genetic Correlation, **SE** Standard Error, **p** P-value,
